# Supplementary material for: Students explain evolution by natural selection differently for humans versus nonhuman animals
Source: Atypon-hosted journal article supplement (doi:10.1187/cbe.21-06-0145), 2023-10-31
Supplement: combinedsupmats.pdf [file combinedsupmats.pdf]

# Supplemental Material

CBE—Life Sciences Education

de Lima and Long

**Table S1.** Number of responses that contain each of the six Key Concepts and three Naïve Ideas pre and post instruction.

|                     |                                            | Pre instruction |       | Post instruction |       |
|---------------------|--------------------------------------------|-----------------|-------|------------------|-------|
|                     |                                            | Cheetah         | Human | Cheetah          | Human |
| <b>Key Concepts</b> | <b>Variation</b>                           | 53              | 52    | 70               | 80    |
|                     | <b>Heritability</b>                        | 33              | 24    | 48               | 46    |
|                     | <b>Competition</b>                         | 3               | 2     | 7                | 2     |
|                     | <b>Limited Resources</b>                   | 99              | 38    | 101              | 46    |
|                     | <b>Differential Survival/ Reproduction</b> | 87              | 80    | 106              | 101   |
|                     | <b>Non-Adaptive Idea</b>                   | 0               | 0     | 3                | 11    |
| <b>Naïve Ideas</b>  | <b>Adapt / Acclimation</b>                 | 23              | 24    | 12               | 2     |
|                     | <b>Need / Goal</b>                         | 41              | 43    | 25               | 25    |
|                     | <b>Use / Disuse</b>                        | 5               | 10    | 1                | 10    |

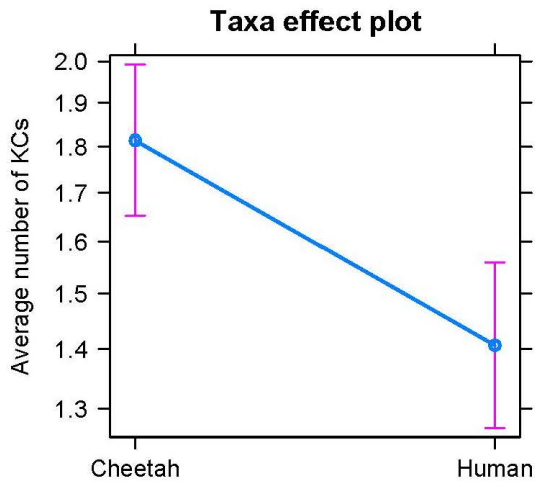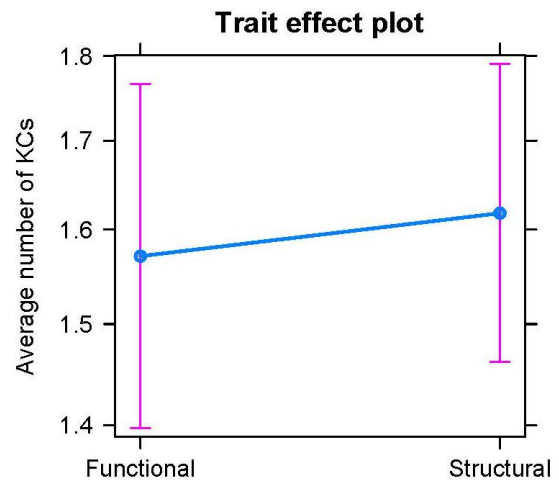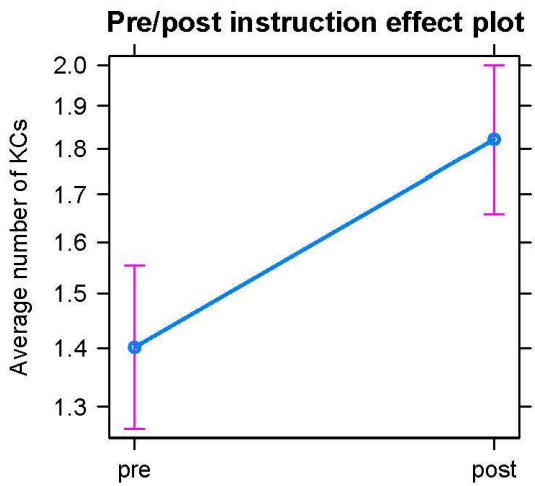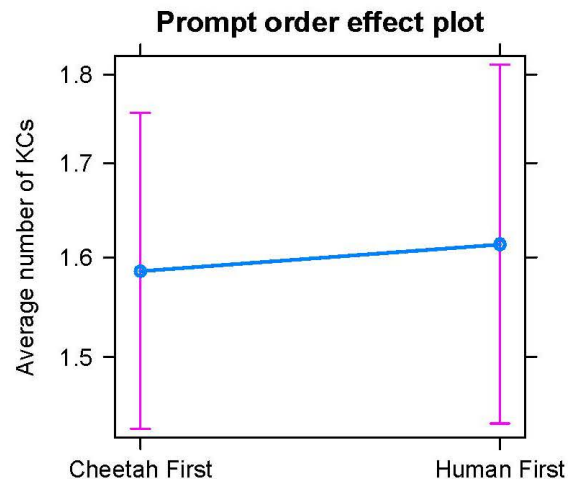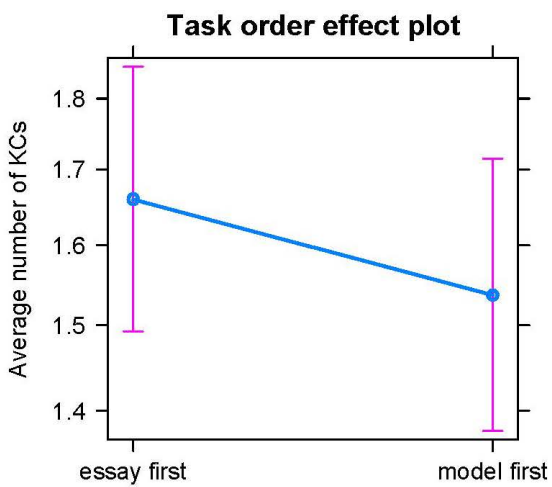

**Figure S1.** Plots showing the effects of taxon, trait type, prompt order, and pre/post instruction on the average number of KCs determined using a mixed-effects Poisson regression.

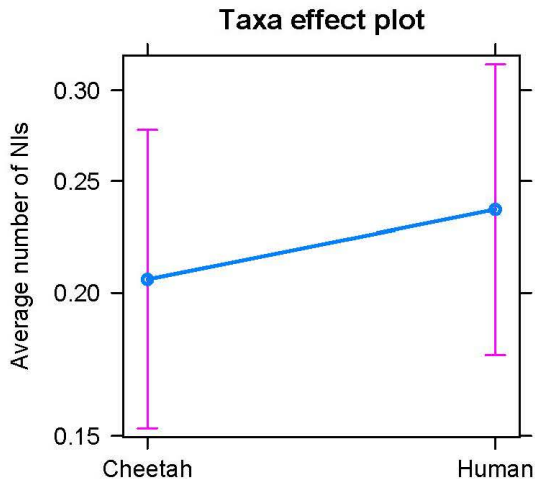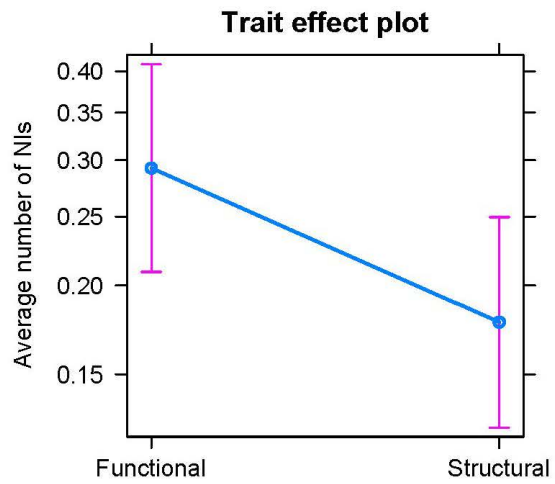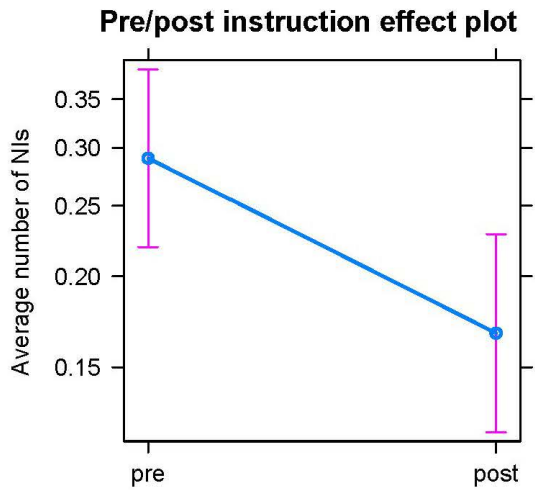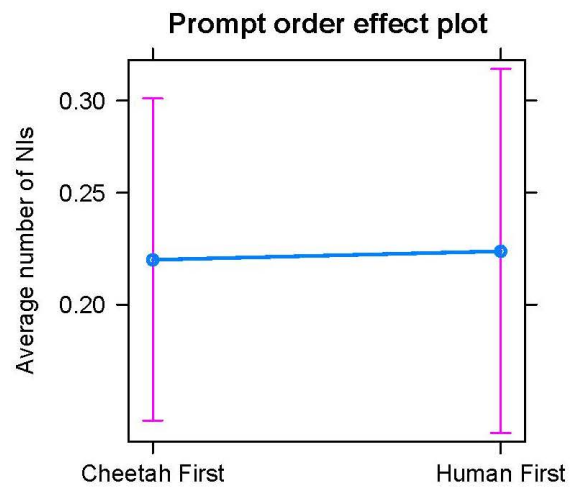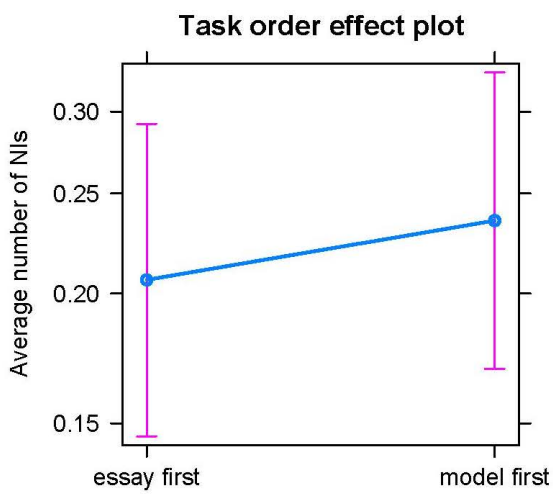

**Figure S2.** Plots showing the effects of taxon, trait type, prompt order, and pre/post instruction on the average number of NIs determined using a mixed-effects Poisson regression.

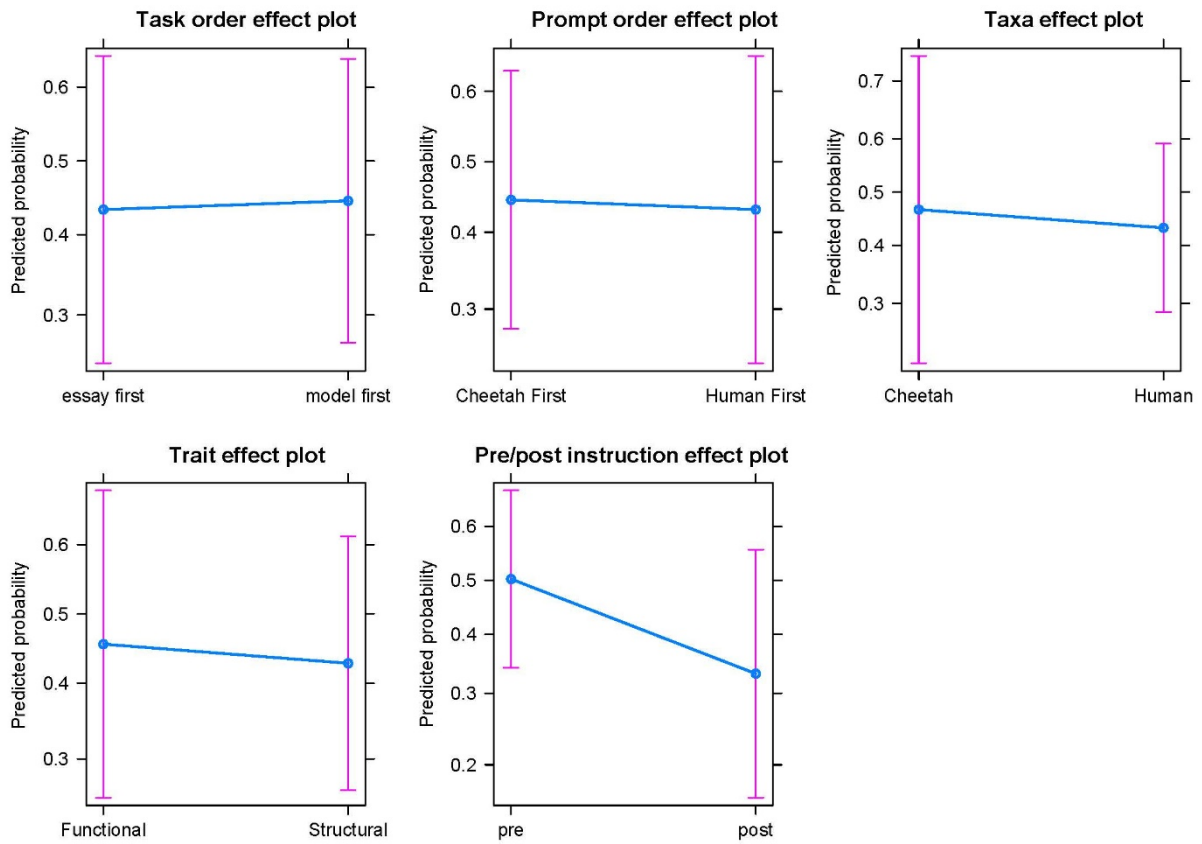

**Figure S3. Predicted probabilities of being in the NI only group vs None group for each of the predictors in the multiple logistic regression model.**

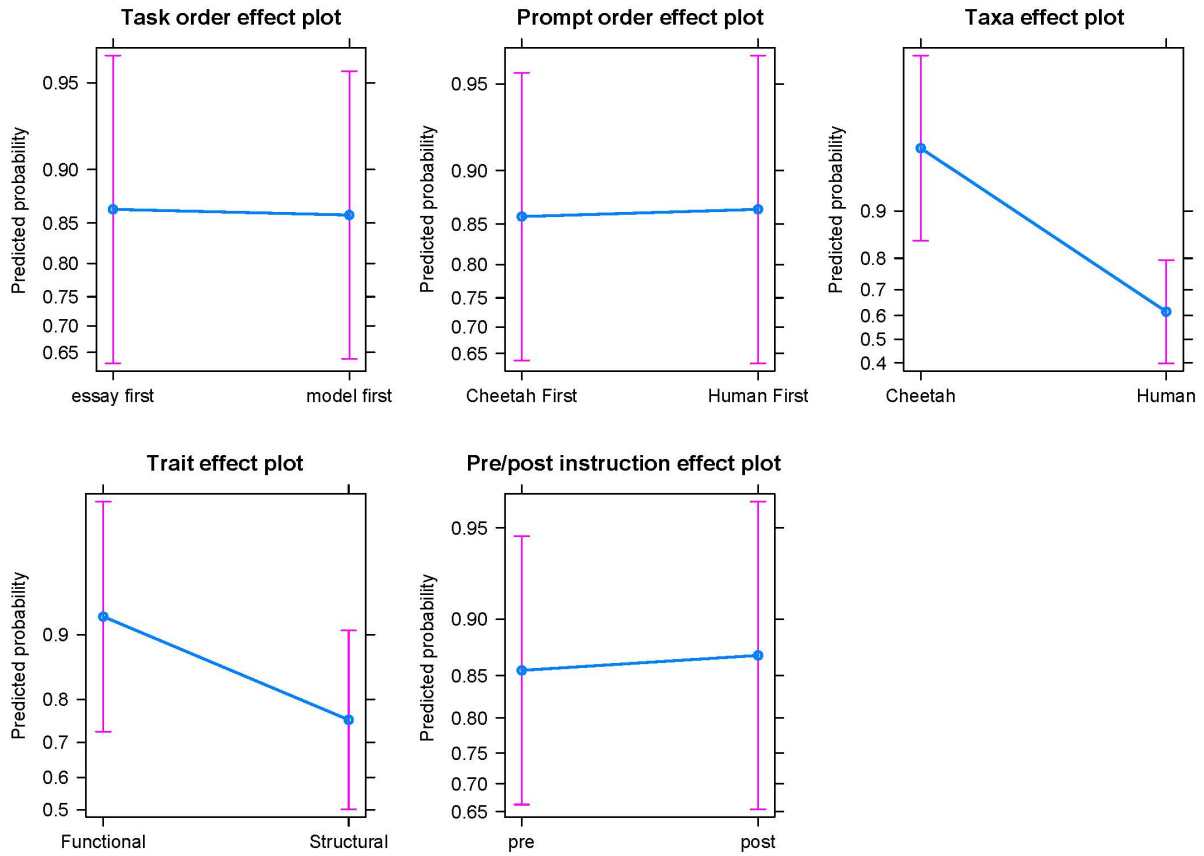

**Figure S4. Predicted probabilities of being in the Mixed group vs None group for each of the predictors in the multiple logistic regression model.**

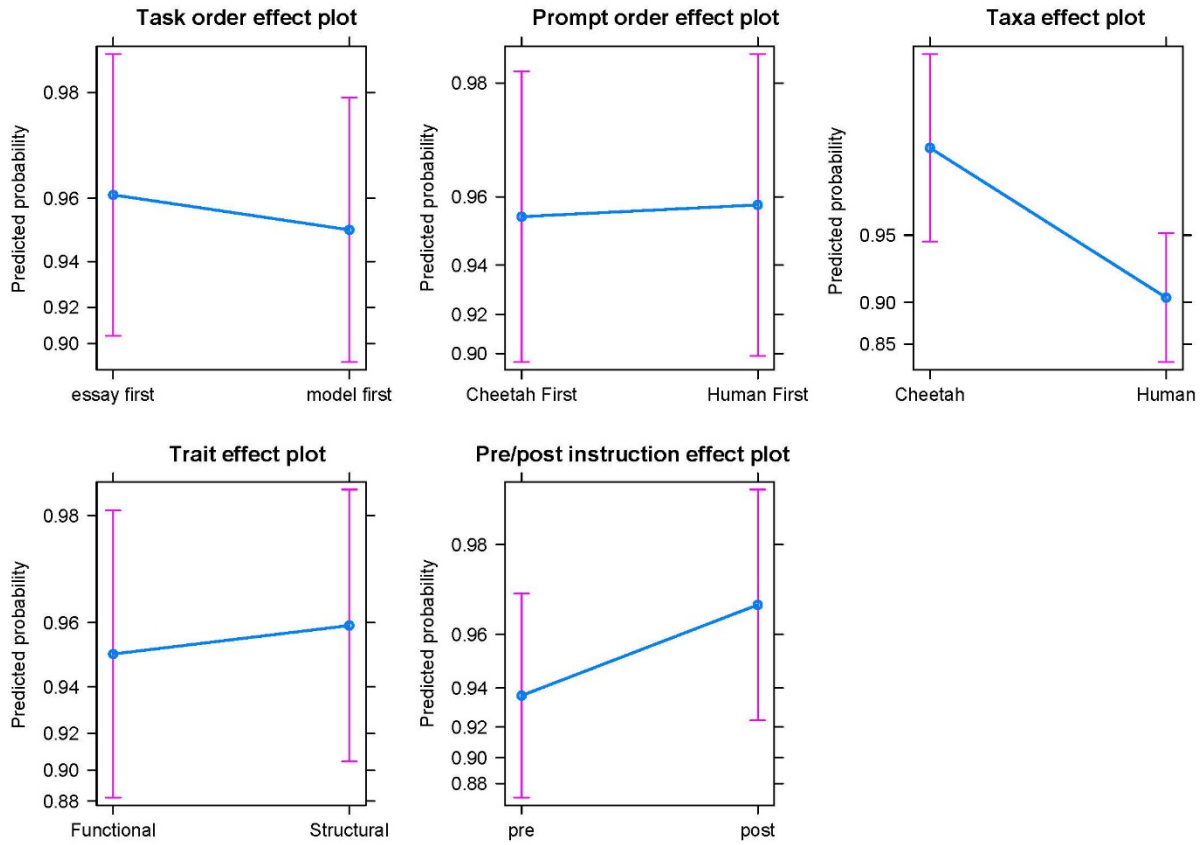

**Figure S5. Predicted probabilities of being in the KC only group vs None group for each of the predictors in the multiple logistic regression model.**

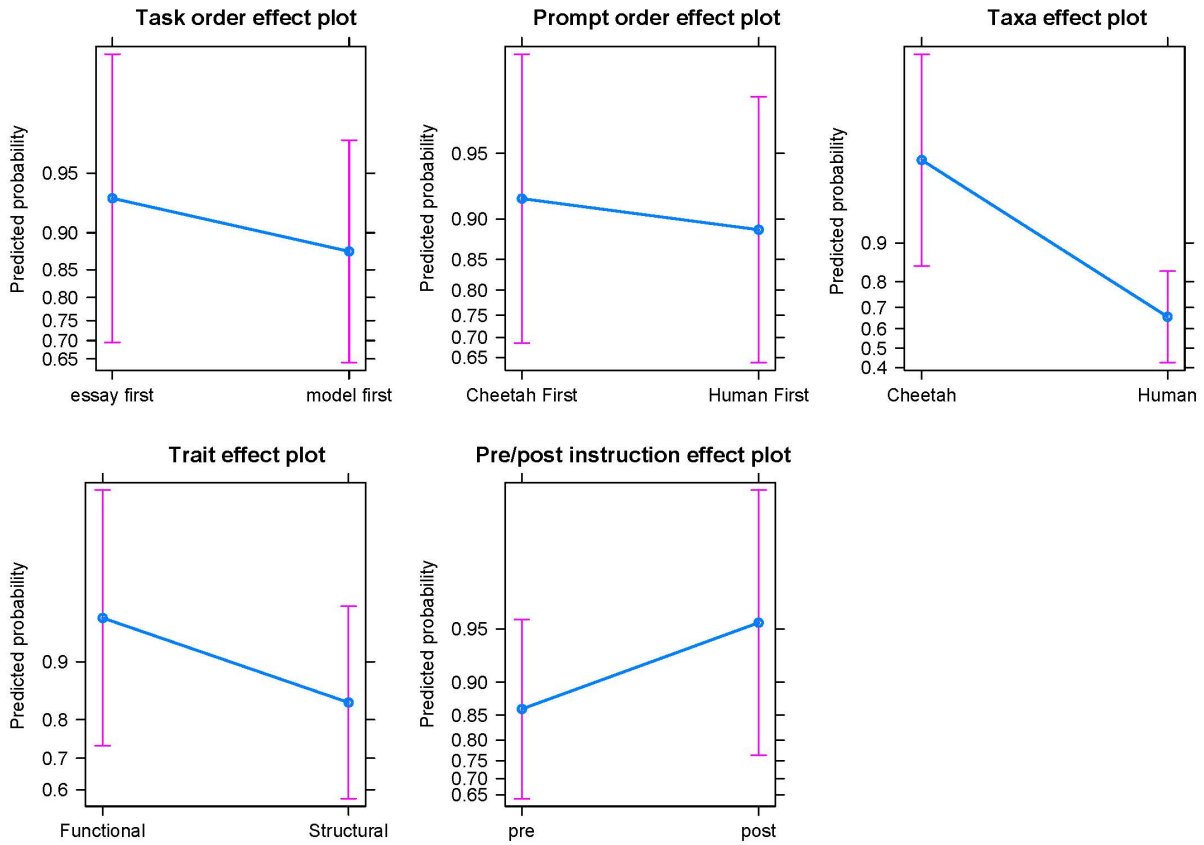

**Figure S6. Predicted probabilities of being in the Mixed group vs NI only group for each of the predictors in the multiple logistic regression model.**



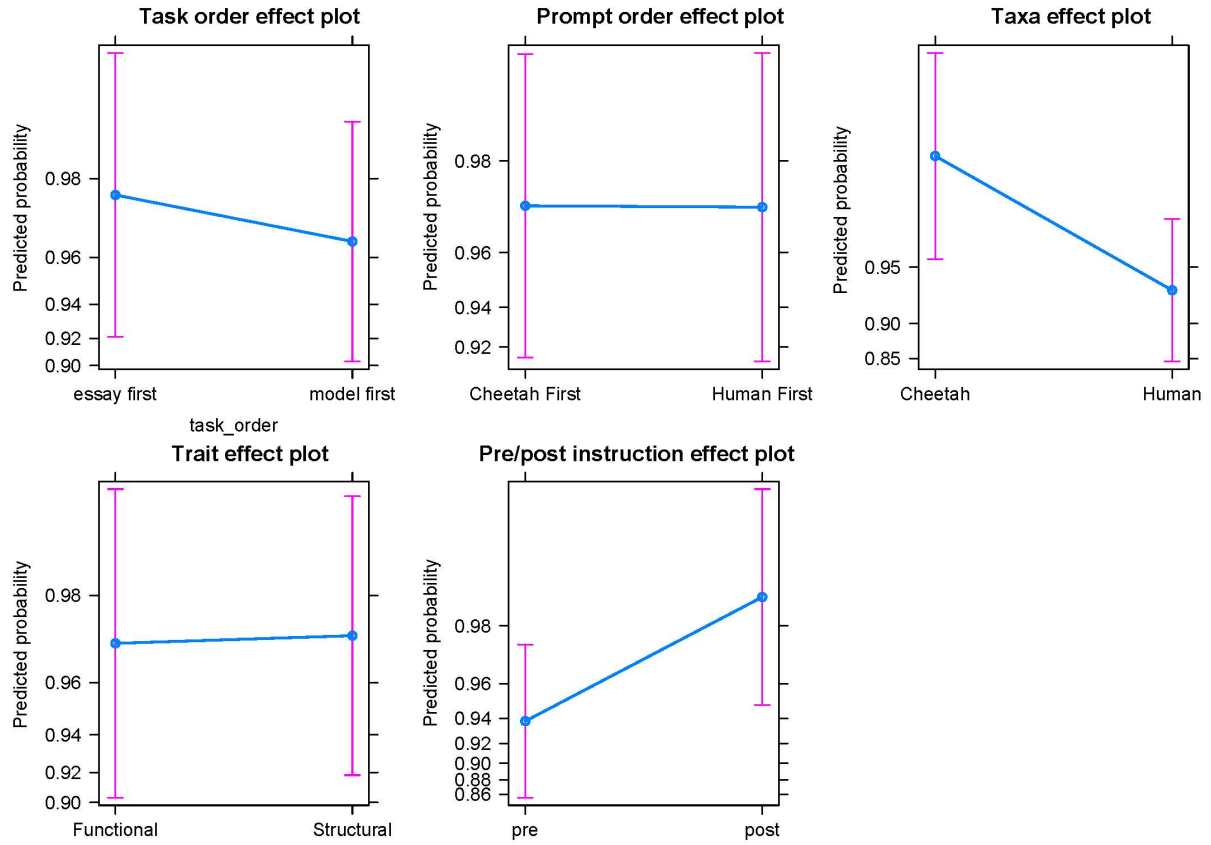

**Figure S7. Predicted probabilities of being in the KC only group vs NI only group for each of the predictors in the multiple logistic regression model.**

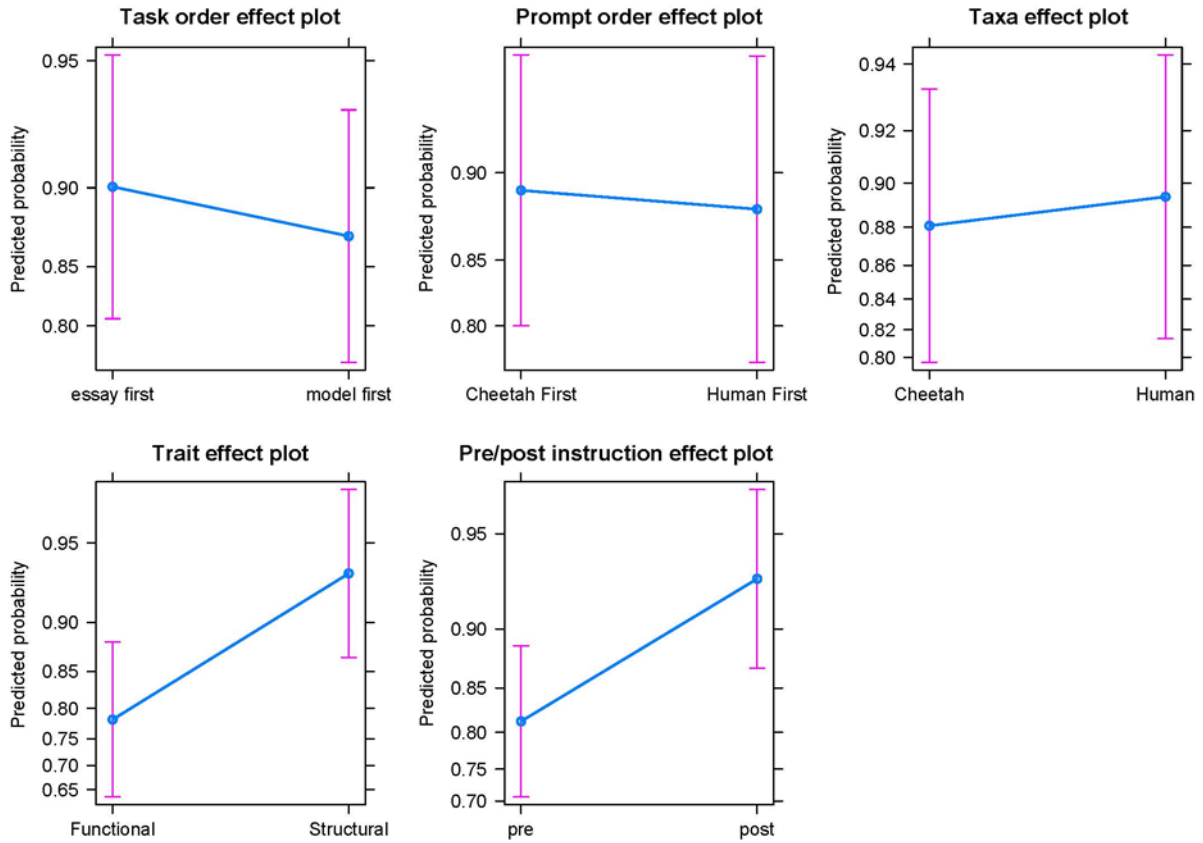

**Figure S8. Predicted probabilities of being in the KC only group vs Mixed group for each of the predictors in the multiple logistic regression model.**
